# Supplementary material
Source: PubMed Central journal article supplement (PMC9890388)
Supplement: NIHMS1862813-supplement-2.pdf [file NIHMS1862813-supplement-2.pdf]

## Supporting Information

Characterization of kinetic isotope effects and label loss  
in deuterium-based isotopic labeling studies.

Robin A. de Graaf, Monique A. Thomas, Kevin L. Behar, Henk M. De Feyter

Departments of Radiology and Biomedical Imaging  
Magnetic Resonance Research Center  
Yale University School of Medicine  
New Haven, Connecticut, USA

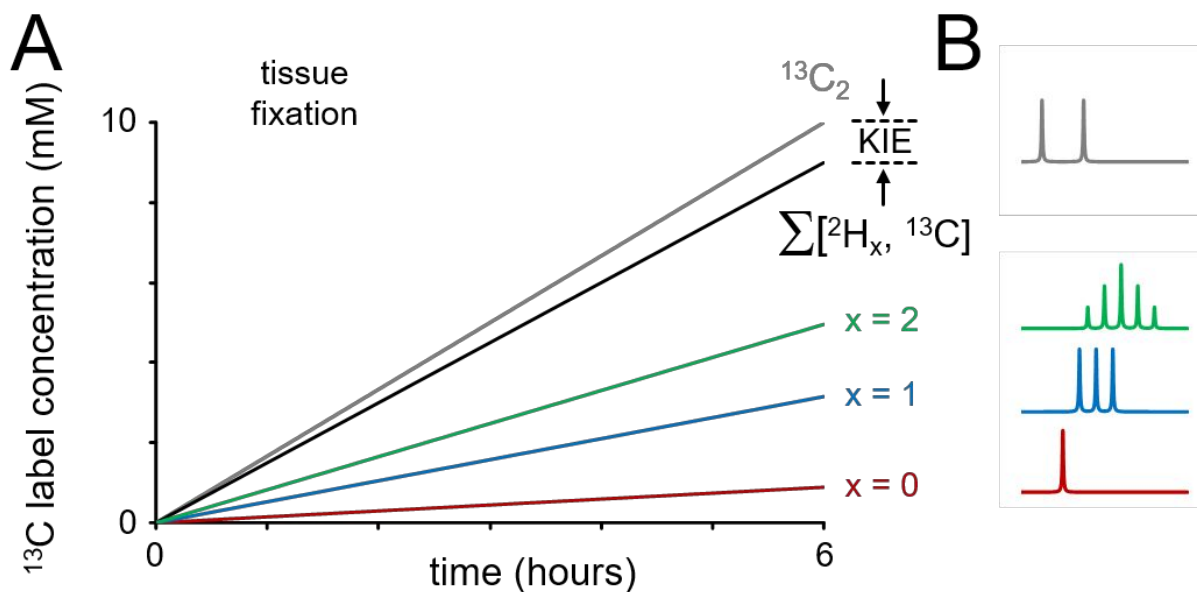

Figure S1 – Illustration of the strategy used to detect deuterium label loss and kinetic isotope effects during glucose metabolism in RG2 cancer cells. The metabolic fate of  $[6,6\text{-}^2\text{H}_2, 6\text{-}^{13}\text{C}]$ -glucose in RG2 cells is similar to that in normal brain, up to and including lactate formation (Fig. 1A). However, unlike normal brain the intracellular lactate is expelled to the extracellular space when it accumulates linearly over time (A). The  $^2\text{H}$  label loss can be quantitatively determined from the unique spectral patterns of non ( $x=0$ ), single ( $x=1$ ) and double ( $x=2$ )-deuterated compounds, similar to that in rat brain (Fig. 1B/C). However, while the ability to measure kinetic isotope effects (KIEs) in rat brain is limited to early time points (Fig. 1B), the ability to measure KIEs in lactate produced by RG2 cancer cells improves over time as the extracellular lactate concentration and thus the NMR sensitivity increases over time. In the current study, KIEs on lactate were determined six hours after the administration of  $[6,6\text{-}^2\text{H}_2, 6\text{-}^{13}\text{C}]$  and  $[5,6\text{-}^{13}\text{C}_2]$ -labeled glucose.

Table S1

Table S1.  $^{13}\text{C}$  chemical shifts and  $^2\text{H}$ - $^{13}\text{C}$  and  $^{13}\text{C}$ - $^{13}\text{C}$  scalar coupling constants

| chemical moiety                                                | chemical shift (ppm) | spectral pattern <sup>1</sup> | $^2\text{H}$ - $^{13}\text{C}$ coupling (Hz) | $^{13}\text{C}$ - $^{13}\text{C}$ coupling (Hz) |
|----------------------------------------------------------------|----------------------|-------------------------------|----------------------------------------------|-------------------------------------------------|
| [2- $^{13}\text{C}$ ]-acetate                                  | 24.10                | singlet                       | –                                            | –                                               |
| [2- $^3\text{H}_2$ , 2- $^{13}\text{C}$ ]-acetate              | 23.39                | septet                        | 19.4                                         | –                                               |
| [1,2- $^{13}\text{C}_2$ ]-acetate                              | 24.10                | doublet                       | –                                            | 52.2                                            |
| [6- $^{13}\text{C}$ ]- $\alpha$ -glucose                       | 61.26                | singlet                       | –                                            | –                                               |
| [6- $^{13}\text{C}$ ]- $\beta$ -glucose                        | 61.40                | singlet                       | –                                            | –                                               |
| [6,6- $^2\text{H}_2$ , 6- $^{13}\text{C}$ ]- $\alpha$ -glucose | 60.63                | quintet                       | 21.6                                         | –                                               |
| [6,6- $^2\text{H}_2$ , 6- $^{13}\text{C}$ ]- $\beta$ -glucose  | 60.77                | quintet                       | 21.6                                         | –                                               |
| [5,6- $^{13}\text{C}_2$ ]- $\alpha$ -glucose                   | 61.26                | doublet                       | –                                            | 43.3                                            |
| [5,6- $^{13}\text{C}_2$ ]- $\beta$ -glucose                    | 61.40                | doublet                       | –                                            | 43.1                                            |
| [4- $^{13}\text{C}$ ]-glutamate                                | 34.20                | singlet                       | –                                            | –                                               |
| [4- $^2\text{H}$ , 4- $^{13}\text{C}$ ]-glutamate              | 33.90                | triplet                       | 19.3                                         | –                                               |
| [4,4- $^2\text{H}_2$ , 4- $^{13}\text{C}$ ]-glutamate          | 33.60                | quintet                       | 19.3                                         | –                                               |
| [4,5- $^{13}\text{C}_2$ ]-glutamate                            | 34.20                | doublet                       | –                                            | 51.3                                            |
| [4- $^{13}\text{C}$ ]-glutamine                                | 31.70                | singlet                       | –                                            | –                                               |
| [4- $^2\text{H}$ , 4- $^{13}\text{C}$ ]-glutamine              | 31.42                | triplet                       | 19.1                                         | –                                               |
| [4,4- $^2\text{H}_2$ , 4- $^{13}\text{C}$ ]-glutamine          | 31.15                | quintet                       | 19.1                                         | –                                               |
| [4,5- $^{13}\text{C}_2$ ]-glutamine                            | 31.70                | doublet                       | –                                            | 48.4                                            |
| [3- $^{13}\text{C}$ ]-lactate                                  | 21.00                | singlet                       | –                                            | –                                               |
| [3- $^2\text{H}$ , 3- $^{13}\text{C}$ ]-lactate                | 20.73                | triplet                       | 19.6                                         | –                                               |
| [3,3- $^2\text{H}_2$ , 3- $^{13}\text{C}$ ]-lactate            | 20.46                | quintet                       | 19.6                                         | –                                               |
| [2,3- $^{13}\text{C}_2$ ]-lactate                              | 21.00                | doublet                       | –                                            | 36.7                                            |

<sup>1</sup> 1 : 1 : 1 triplet intensity ratio, 1 : 2 : 3 : 2 : 1 quintet intensity ratio, 1 : 3 : 6 : 7 : 6 : 3 : 1 septet intensity ratio

Table S2

Table S2: overview of  $^2\text{H}$  detection following [6,6- $^2\text{H}_2$ ]-glucose and [ $^2\text{H}_3$ ]-acetate administration $^1$   $^2\text{H}$  detection as percent of theoretical condition without  $^2\text{H}$  label loss;  $^2$  correction factor to account

| [6,6- $^2\text{H}_2$ ]-glucose |                                 | Number of $^2\text{H}$ 's | Lactate (%) | Glutamate (%) | Glutamine (%) |
|--------------------------------|---------------------------------|---------------------------|-------------|---------------|---------------|
|                                |                                 | 0                         | 6.1         | 8.6           | 17.1          |
|                                |                                 | 1                         | 19.2        | 58.5          | 48.9          |
|                                |                                 | 2                         | 74.7        | 32.9          | 34.0          |
|                                | $^2\text{H}$ detection $^1$ (%) |                           | 84.3        | 62.2          | 58.5          |
|                                | Corr. Factor $^2$               |                           | 1.19        | 1.61          | 1.71          |
| [ $^2\text{H}_3$ ]-acetate     |                                 | 0                         | -           | 1.9           | 1.7           |
|                                |                                 | 1                         | -           | 25.0          | 23.9          |
|                                |                                 | 2                         | -           | 73.1          | 74.4          |
|                                | $^2\text{H}$ detection $^1$ (%) |                           |             | 85.6          | 86.4          |
|                                | Corr. Factor $^2$               |                           |             | 1.17          | 1.16          |

for  $^2\text{H}$  label loss (=  $100/^{^2\text{H}}\text{detection} \%$ ).

Table S3

| [6,6- $^2\text{H}_2$ ]-glucose |          |          |          | [ $^2\text{H}_3$ ]-acetate |          |          |          |
|--------------------------------|----------|----------|----------|----------------------------|----------|----------|----------|
| GluC45                         | GluC4*   | GlnC45   | GlnC4*   | GluC45                     | GluC4*   | GlnC45   | GlnC4*   |
| 258.1359                       | 243.137  | 70.87629 | 90.79144 | 52.47899                   | 50.7415  | 132.9089 | 122.9795 |
| 258.5385                       | 266.4078 | 68.76839 | 80.29604 | 51.1376                    | 57.2921  | 122.9637 | 104.16   |
| 271.24                         | 253.5845 | 69.21154 | 62.13724 | 51.81434                   | 57.4459  | 131.2125 | 131.575  |
| 260.6389                       | 244.5796 | 98.10261 | 83.25074 | 53.23753                   | 51.7202  | 127.1388 | 143.4107 |
| 264.6017                       | 223.7511 | 74.96709 | 59.51254 | 53.66343                   | 48.1937  | 132.2286 | 128.4037 |
| 263.5571                       | 264.5288 | 107.0283 | 96.12124 | 52.51301                   | 50.2862  | 127.3109 | 114.6129 |
| 256.8924                       | 248.7913 | 82.67671 | 86.61864 | 53.3834                    | 52.1368  | 126.9423 | 117.5223 |
| 256.6564                       | 245.2777 | 97.54357 | 83.02174 | 51.30678                   | 46.98212 | 121.6785 | 104.2648 |
| 235.7482                       | 254.5008 | 78.16225 | 70.81884 | 49.36228                   | 41.59322 | 135.0201 | 114.5811 |
| 256.1952                       | 243.6042 | 98.21196 | 115.3378 | 52.75761                   | 55.9971  | 133.5952 | 121.2488 |
| 256.8988                       | 245.2395 | 94.74825 | 76.70464 | 55.09579                   | 52.2748  | 107.6864 | 120.8888 |
| 256.7068                       | 246.6887 | 79.35503 | 90.37984 | 53.69655                   | 57.1855  | 132.1521 | 127.8991 |
| 256.9639                       | 245.0671 | 64.49319 | 86.74694 | 53.87924                   | 45.7634  | 125.4612 | 120.9993 |
| 259.4076                       | 248.8593 | 96.40961 | 104.994  | 52.55123                   | 50.3653  | 134.3086 | 122.6068 |
| 260.0252                       | 238.5266 | 88.45408 | 72.32584 | 56.21894                   | 50.8962  | 128.6388 | 111.9608 |
| 237.6358                       | 263.5782 | 61.37202 | 75.96994 | 53.61451                   | 40.4319  | 129.203  | 122.5179 |
| 257.1994                       | 248.4743 | 80.304   | 65.61784 | 53.22721                   | 49.516   | 137.6641 | 133.4531 |
| 259.0861                       | 223.3834 | 93.77139 | 58.78034 | 50.7847                    | 51.02    | 131.7984 | 127.8295 |
| 255.5556                       | 245.7601 | 91.28173 | 89.13214 | 48.53252                   | 39.7964  | 128.7336 | 126.9568 |
| 257.7725                       | 263.5441 | 96.20887 | 84.04474 | 48.5022                    | 50.20141 | 127.2967 | 102.3166 |

Quantification of glutamate (Glu) and glutamine (Gln) peaks from the spectra generated via Monte Carlo simulation, for [6,6- $^2\text{H}_2$ ]-glucose, and [ $^2\text{H}_3$ ]-acetate.
